# Supplementary material
Source: HighWire-hosted journal article supplement (https://www.rcpjournals.org/highwire/filestream/8497/field_highwire_adjunct_files/0/Shah_supp_file_1.pdf)

Number of self-directed community engagement hours (Football)

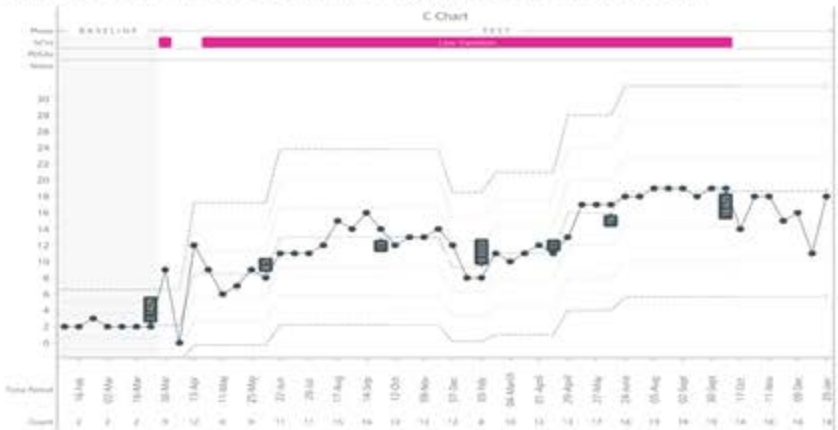

Discussion of risk/benefits of psychotropics and future pregnancies prior to discharge

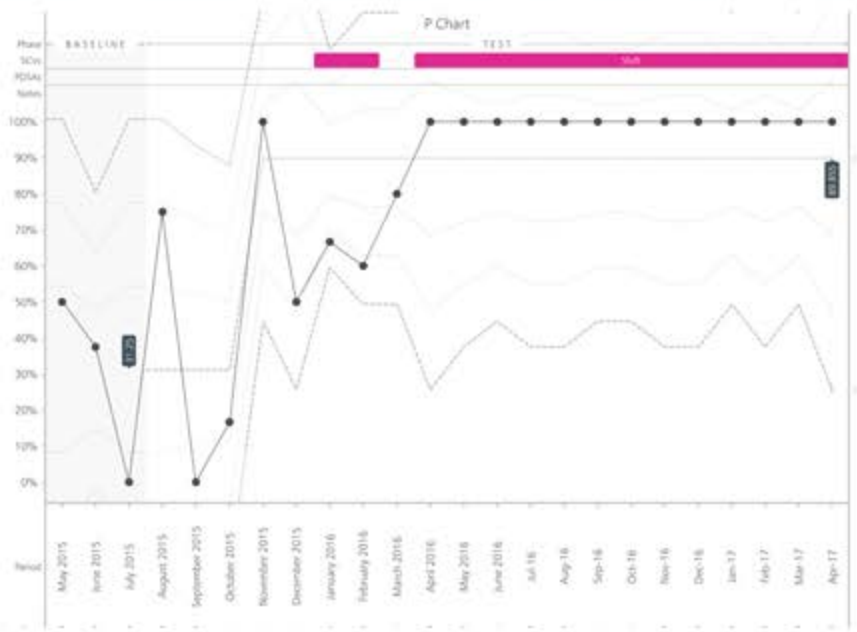

P chart: % people saying they agree or strongly agree that they are experiencing a positive environment

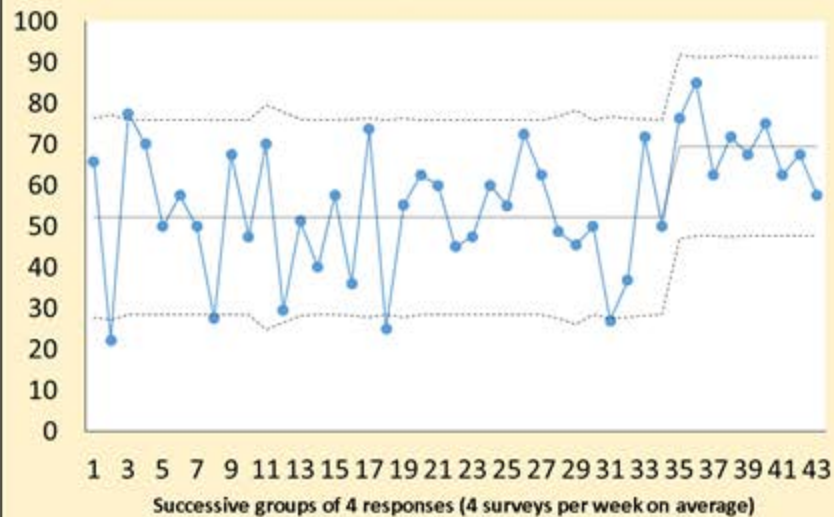

Supplement: Shah_supp_file_1.pdf [file Shah_supp_file_1.pdf]
